# Supplementary material for: Fracture Behavior of Rock with Initial Damage: Theoretical, Experimental, and Numerical Investigations
Source: Hindawi journal article supplement (doi:10.1155/2020/8886843), 2020-09-22
Supplement: f1 [file 8886843.f1.zip]

Archive with 7 entries (7 files):
- 8886843.f1/FigS1a.pdf
- 8886843.f1/FigS1b.pdf
- 8886843.f1/FigS1c.pdf
- 8886843.f1/FigS2.pdf
- 8886843.f1/FigS3a.pdf
- 8886843.f1/FigS3b.pdf
- 8886843.f1/FigS3c.pdf
