# Supplementary figures and images for: Fracture Behavior of Rock with Initial Damage: Theoretical, Experimental, and Numerical Investigations
Source: Hindawi journal article supplement (doi:10.1155/2020/8886843), 2020-09-22

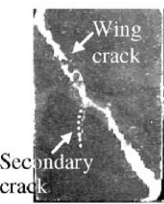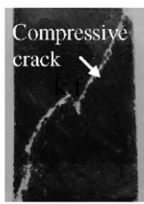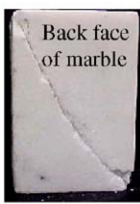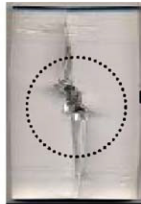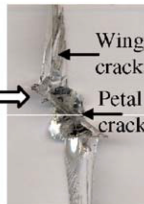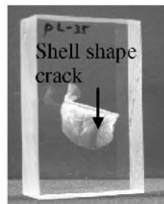

Supplement: f1 [file 8886843.f1.zip]

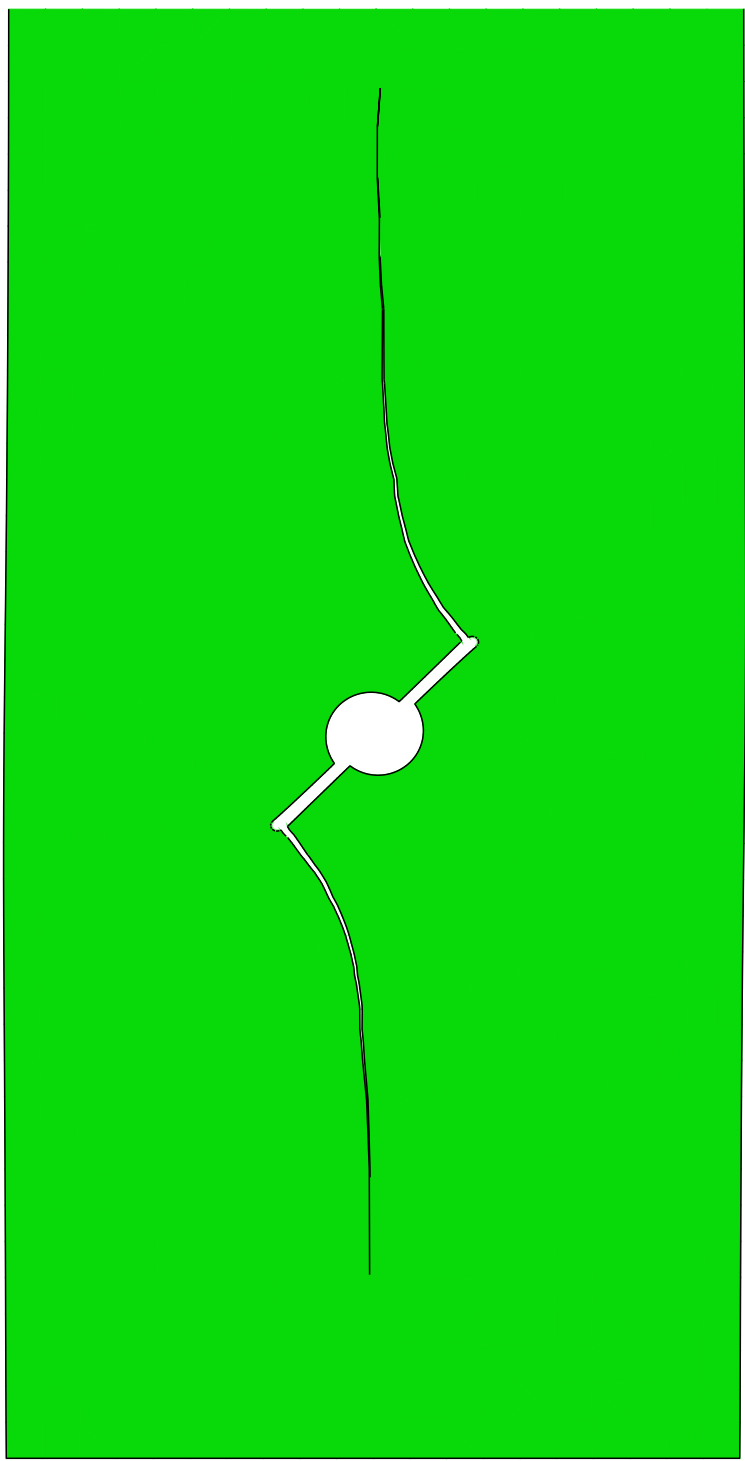

Supplement: f1 [file 8886843.f1.zip]

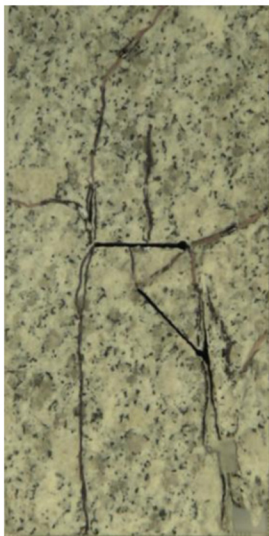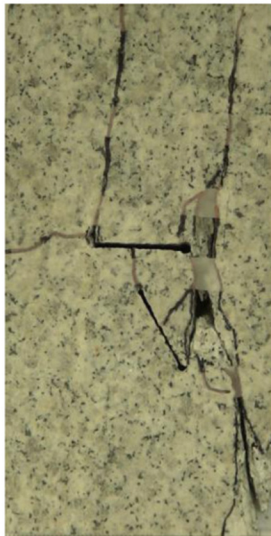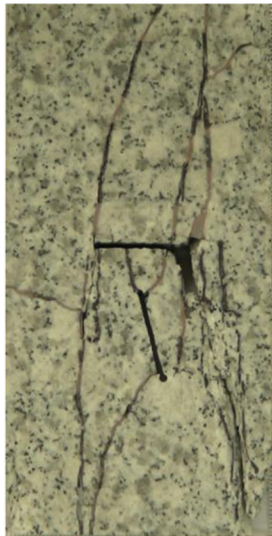

Supplement: f1 [file 8886843.f1.zip]

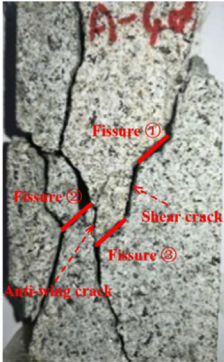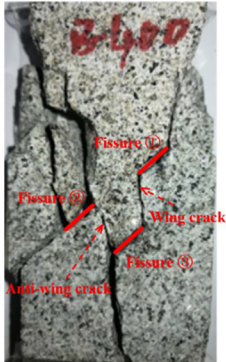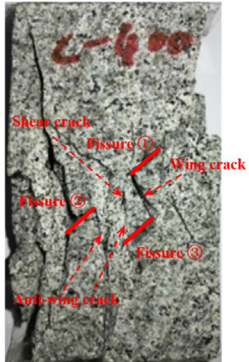

Supplement: f1 [file 8886843.f1.zip]

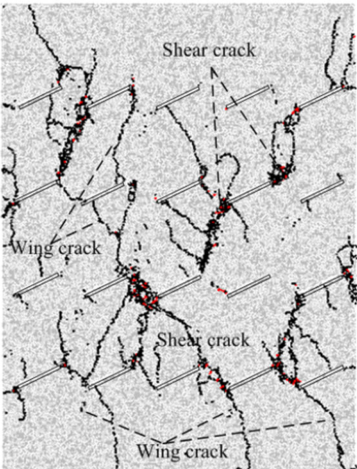

Supplement: f1 [file 8886843.f1.zip]

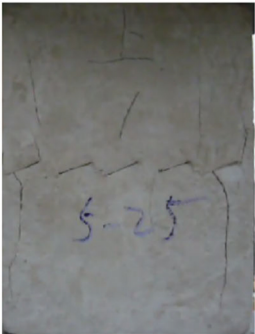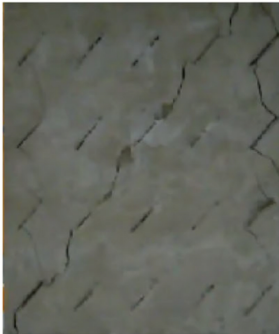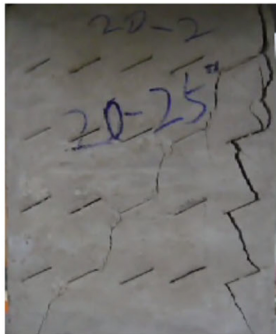

Supplement: f1 [file 8886843.f1.zip]

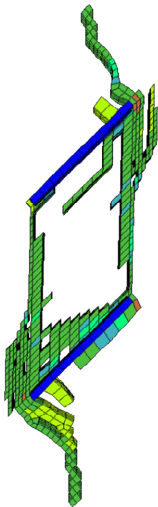

Supplement: f1 [file 8886843.f1.zip]
